# Supplementary material for: Caspase-8 contributes to angiogenesis and chemotherapy resistance in glioblastoma
Source: PubMed Central journal article supplement (PMC5464770; doi:10.7554/elife.22593), 2017-06-08
Supplement: elife-22593-fig2-data4.pdf [file elife-22593-fig2-data4.pdf]

| <b>Cytokines</b> | <b>Pearson Correlation</b> | <b>P-Value</b> |
|------------------|----------------------------|----------------|
| <i>MCP-1</i>     | 0.527                      | 7.900E-15      |
| <i>IL-1β</i>     | 0.309                      | 3.400E-05      |
| <i>IL-6</i>      | 0.252                      | 7.900E-04      |
| <i>IL-8</i>      | 0.269                      | 3.300E-04      |
| <i>VEGF</i>      | 0.093                      | 2.240E-01      |

Figure 2\_source data 4
